# Supplementary material for: Genome-wide identification and characterization of NPF family reveals NtNPF6.13 involving in salt stress in Nicotiana tabacum
Source: Front Plant Sci. 2022 Oct 13;13:999403. doi: 10.3389/fpls.2022.999403 (PMC9608447; doi:10.3389/fpls.2022.999403)
Supplement: Supplementary Table 1 — Sequences of NtNPF6-specificqPCR primers. [file Table_1.xlsx]

## Sheet: Sheet1
Gene name	Forward primer (5'-3')	Reverse primer (5'-3')
NtNPF6.3	CCAGTAGCCAGCAACTTGCTCTAC	CAAATTGATCCGACCCAAACC
NtNPF6.4	CAGTGACTGTACTGGTGTATT	GTCGTTCCACCAATCAATAC
NtNPF6.5	CTTGTTAACACTGACAACGG	TGCCTAATGCTATTAGATAT
NtNPF6.6	CAACCTTGTCATCCTCATGAG	GATTTTAAGCCACCAGTG
NtNPF6.7	GATGTCAGTTGTCAACCAG	GCCACCAGTACCTAATGC
NtNPF6.8	TATCCATTGGCCTTGTACTT	CACTTATTGGCAAATTAGTTG
NtNPF6.9	CTGCGACCTCCAAAGTGTG	GTGCCTAGAGCCGTCATGT
NtNPF6.10	TACGACCTCCAAAATGTG	GAGACACTGGATTTTAAGCC
NtNPF6.11	TGTGGGATCACTTGGTGC	TGTGCCCGATAAGAATATG
NtNPF6.12	GTTCCGATCAATTCGACG	GTACTGTCACTGCACCAAGGG
NtNPF6.13	GACCATCTCAACTATAAT	TAGGACCATGAGTTGTTTG
NtNPF6.14	CCCTAACCGAGGTTAAG	GAACTAGCCAAAATACAGTC
NtNPF6.15	TTTCACAGGGCTAGTCCT	CTGTCAATGGAATTGTAGC
NtNPF6.16	CAATTCGACGATGCTGACA	TCCCAAATTATCTTGAATATAC
NtNPF6.17	GCAGTAACAGTATTGGTGT	GAACACAACAAGTCCAATAAC
NtNPF6.18	GCCGCTGCCCTAACGGAGGTT	TGCCCCCACTAGCAAGAAT
26S	GAAGAAGGTCCCAAGGGTTC	TCTCCCTTTAACACCAACGG
