# Supplementary material for: Genome-wide identification and characterization of NPF family reveals NtNPF6.13 involving in salt stress in Nicotiana tabacum
Source: Front Plant Sci. 2022 Oct 13;13:999403. doi: 10.3389/fpls.2022.999403 (PMC9608447; doi:10.3389/fpls.2022.999403)
Supplement: Supplementary Table 2 — Characterization of the NtNPF family in tobacco. [file Table_2.xls]

## Sheet: K326_gene_info_v2_paperid
Gene Name	Gene ID	Chromosome location	Strand	Exon No.	gDNA Length (bp)	CDS Length (bp)	Peptide Length （aa）	Mw (kDa)	pI
NtNPF1.1	Nitab4.5_0004963g0010	Nt20:16433551-16436779	+	3	3229	1485	494	54.8718	7.2848
NtNPF1.2	Nitab4.5_0001474g0110	Nt24:92629406-92630011	-	1	606	606	201	22.8479	4.8671
NtNPF1.3	Nitab4.5_0004963g0020	Nt20:16458909-16474967	+	6	16059	2643	881	97.9033	7.3647
NtNPF1.4	Nitab4.5_0004033g0020	Nitab4.5_0004033:6759-10678	-	4	3920	1737	578	64.6945	6.9012
NtNPF1.5	Nitab4.5_0005197g0010	Nitab4.5_0005197:181275-183370	-	4	2096	1542	514	56.825	5.8643
NtNPF1.6	Nitab4.5_0000151g0290	Nt23:49143376-49145354	-	4	1979	1425	474	52.9121	5.4135
NtNPF1.7	Nitab4.5_0001734g0010	Nt18:68787998-68790075	-	4	2078	1746	581	63.8096	8.3937
NtNPF1.8	Nitab4.5_0001139g0010	Nt09:42473526-42475664	+	5	2139	1638	545	60.1742	8.5714
NtNPF1.9	Nitab4.5_0004391g0020	Nt08:106422070-106437581	-	12	15512	3102	1034	114.479	8.8046
NtNPF1.10	Nitab4.5_0001004g0010	Nt21:75904856-75915569	-	13	10714	3363	1120	124.009	9.2486
NtNPF1.11	Nitab4.5_0001309g0110	Nt15:33262070-33266759	+	4	4690	1731	576	63.0195	5.7693
NtNPF1.12	Nitab4.5_0001737g0090	Nt20:57570819-57575490	-	4	4672	1731	576	62.8474	5.4927
NtNPF1.13	Nitab4.5_0001968g0130	Nt20:86819677-86824726	+	4	5050	1758	585	65.0562	9.342
NtNPF1.14	Nitab4.5_0002859g0160	Nt15:11504626-11508701	-	4	4076	1740	579	64.2322	8.7788
NtNPF1.15	Nitab4.5_0011683g0030	Nitab4.5_0011683:47860-49345	-	3	1486	1251	416	46.2395	9.5775
NtNPF1.16	Nitab4.5_0001315g0050	Nt04:6554084-6554764	-	1	681	681	226	25.329	9.7552
NtNPF1.17	Nitab4.5_0004564g0020	Nitab4.5_0004564:167774-171414	+	3	3641	1842	613	68.4111	9.0631
NtNPF1.18	Nitab4.5_0001315g0010	Nt04:6581514-6586000	-	3	4487	1842	613	68.7134	9.061
NtNPF1.19	Nitab4.5_0006926g0020	Nitab4.5_0006926:137870-140598	-	3	2729	1755	585	65.512	9.1825
NtNPF1.20	Nitab4.5_0000671g0040	Nitab4.5_0000671:232163-234615	+	3	2453	1494	497	55.8115	8.6817
NtNPF2.1	Nitab4.5_0000679g0150	Nt24:95908095-95917883	+	4	9789	1839	612	68.3588	9.0046
NtNPF2.2	Nitab4.5_0001055g0010	Nitab4.5_0001055:66431-70849	+	4	4419	1833	610	68.0814	8.9012
NtNPF2.3	Nitab4.5_0010939g0010	Nitab4.5_0010939:3187-10221	-	6	7035	1953	651	70.9315	8.8816
NtNPF2.4	Nitab4.5_0000270g0060	Nt22:44243889-44252647	-	7	8759	2286	761	83.7499	9.0654
NtNPF2.5	Nitab4.5_0001698g0090	Nitab4.5_0001698:464104-465491	-	4	1388	1080	360	40.6965	9.7196
NtNPF2.6	Nitab4.5_0000533g0080	Nt18:9040658-9046671	+	9	6014	2376	791	88.145	8.8608
NtNPF2.7	Nitab4.5_0000888g0070	Nt09:92719488-92726703	-	6	7216	1863	621	69.6951	8.3641
NtNPF2.8	Nitab4.5_0000533g0100	Nt18:9037162-9038111	+	2	950	312	103	11.4706	9.7465
NtNPF2.9	Nitab4.5_0007582g0010	Nitab4.5_0007582:116491-117150	+	1	660	660	219	24.1984	9.5262
NtNPF2.10	Nitab4.5_0000270g0050	Nt22:44307773-44310476	-	3	2704	1596	531	57.8482	8.0446
NtNPF2.11	Nitab4.5_0000372g0050	Nt08:53583006-53585690	-	3	2685	1596	531	58.0848	8.7623
NtNPF2.12	Nitab4.5_0000533g0050	Nt18:8960234-8962431	+	5	2198	1023	340	37.689	9.9365
NtNPF2.13	Nitab4.5_0000888g0080	Nt09:92766510-92768497	-	3	1988	531	176	19.7357	8.6517
NtNPF2.14	Nitab4.5_0000888g0110	Nt09:92782005-92783762	-	2	1758	519	173	19.8774	10.1843
NtNPF2.15	Nitab4.5_0000888g0120	Nt09:92780960-92781416	-	2	457	426	141	15.8897	10.9948
NtNPF2.16	Nitab4.5_0004048g0010	Nt06:122603451-122605700	+	4	2250	1758	585	65.4235	8.9624
NtNPF2.17	Nitab4.5_0005357g0040	Nt12:40693694-40697317	+	3	3624	333	110	12.2666	9.0142
NtNPF2.18	Nitab4.5_0000642g0010	Nitab4.5_0000642:3948-6345	-	4	2398	1758	585	65.3496	9.0651
NtNPF2.19	Nitab4.5_0000983g0020	Nt20:33492815-33494815	-	4	2001	1722	573	64.0888	9.22
NtNPF2.20	Nitab4.5_0000003g0010	Nt22:51884355-51887414	+	6	3060	1542	513	56.9073	9.2893
NtNPF2.21	Nitab4.5_0000909g0040	Nt08:46864079-46866366	+	4	2288	1092	363	40.869	9.4579
NtNPF2.22	Nitab4.5_0007642g0020	Nitab4.5_0007642:44629-47937	-	4	3309	1806	601	67.1402	9.3665
NtNPF2.23	Nitab4.5_0011731g0010	Nitab4.5_0011731:5423-8690	+	4	3268	1809	602	67.2944	9.3585
NtNPF2.24	Nitab4.5_0000642g0020	Nitab4.5_0000642:51505-53574	-	2	2070	1530	510	56.8809	8.8948
NtNPF2.25	Nitab4.5_0004048g0050	Nt06:122551040-122553465	+	3	2426	1881	626	69.6686	8.6523
NtNPF3.1	Nitab4.5_0000133g0010	Nt12:59253501-59256083	-	4	2583	843	281	30.938	8.4436
NtNPF3.2	Nitab4.5_0003333g0010	Nitab4.5_0003333:155316-166794	+	4	11479	1824	608	68.1324	8.365
NtNPF3.3	Nitab4.5_0003330g0010	Nitab4.5_0003330:33568-38688	+	5	5121	1611	537	59.8412	8.5119
NtNPF3.4	Nitab4.5_0000874g0180	Nitab4.5_0000874:607322-612225	-	4	4904	1677	558	62.2119	8.8206
NtNPF4.1	Nitab4.5_0007689g0040	Nitab4.5_0007689:77199-81940	-	6	4742	1803	600	66.7284	8.9501
NtNPF4.2	Nitab4.5_0002261g0020	Nt19:129266160-129267714	+	3	1555	1053	350	39.8914	10.0285
NtNPF4.3	Nitab4.5_0000460g0040	Nitab4.5_0000460:375950-380680	+	5	4731	1728	575	63.8581	8.8401
NtNPF4.4	Nitab4.5_0002159g0010	Nt10:47221047-47225938	-	4	4892	1497	498	55.4623	9.5082
NtNPF4.5	Nitab4.5_0001710g0020	Nitab4.5_0001710:248006-252422	-	5	4417	1836	611	67.7141	9.1513
NtNPF4.6	Nitab4.5_0000079g0040	Nt04:116791511-116795222	-	5	3712	1809	602	66.8289	9.0562
NtNPF4.7	Nitab4.5_0008153g0020	Nitab4.5_0008153:12903-20268	+	4	7366	618	206	22.297	8.5941
NtNPF4.8	Nitab4.5_0004605g0120	Nt06:123177636-123180859	+	4	3224	1788	595	65.8577	8.3244
NtNPF4.9	Nitab4.5_0000785g0250	Nt04:28512991-28516290	+	4	3300	1848	615	68.2977	8.8105
NtNPF4.10	Nitab4.5_0010420g0010	Nitab4.5_0010420:7273-18341	+	6	11069	1896	631	68.7124	9.138
NtNPF4.11	Nitab4.5_0000679g0050	Nt24:95513205-95522062	-	7	8858	1863	620	68.2389	8.9454
NtNPF4.12	Nitab4.5_0000679g0060	Nt24:95581999-95592316	-	5	10318	1680	559	61.1694	9.041
NtNPF4.13	Nitab4.5_0002969g0010	Nitab4.5_0002969:48700-55648	-	4	6949	1752	583	63.4952	8.5093
NtNPF4.14	Nitab4.5_0000417g0150	Nt12:46894926-46900249	+	5	5324	1803	601	66.1924	8.8086
NtNPF4.15	Nitab4.5_0013559g0010	Nitab4.5_0013559:673-8767	-	4	8095	1776	591	65.0552	8.8634
NtNPF4.16	Nitab4.5_0014978g0020	Nitab4.5_0014978:4343-7948	+	4	3606	1056	352	39.2283	8.6743
NtNPF4.17	Nitab4.5_0002507g0090	Nitab4.5_0002507:147144-151246	+	3	4103	1524	508	56.6377	8.9559
NtNPF4.18	Nitab4.5_0001225g0170	Nt17:194084142-194084516	+	1	375	375	124	13.9075	7.9044
NtNPF4.19	Nitab4.5_0000541g0070	Nt07:21611273-21614876	-	6	3604	1875	624	69.1696	8.908
NtNPF4.20	Nitab4.5_0003511g0040	Nt19:125374770-125378915	+	6	4146	1710	569	63.285	9.7643
NtNPF4.21	Nitab4.5_0000081g0170	Nt09:62699689-62703237	+	6	3549	1782	593	66.1829	9.0934
NtNPF4.22	Nitab4.5_0002303g0040	Nt18:64005266-64008041	+	5	2776	756	252	27.677	9.0652
NtNPF4.23	Nitab4.5_0000068g0180	Nt12:107886135-107892220	+	7	6086	3132	1043	116.183	9.0505
NtNPF4.24	Nitab4.5_0008935g0050	Nitab4.5_0008935:24323-37612	-	8	13290	3417	1138	126.827	8.9997
NtNPF5.1	Nitab4.5_0007185g0070	Nitab4.5_0007185:108482-115168	-	3	6687	1260	420	46.9314	9.2183
NtNPF5.2	Nitab4.5_0004905g0020	Nt03:93916460-93919976	-	4	3517	1596	531	59.0118	9.4333
NtNPF5.3	Nitab4.5_0003329g0020	Nitab4.5_0003329:141109-143917	+	3	2809	1593	530	58.9664	7.8697
NtNPF5.4	Nitab4.5_0004233g0010	Nt04:135684901-135688532	+	4	3632	1767	588	65.0401	5.4912
NtNPF5.5	Nitab4.5_0008515g0030	Nitab4.5_0008515:50825-51208	-	2	384	321	106	12.0932	4.8791
NtNPF5.6	Nitab4.5_0004233g0040	Nt04:135833462-135842873	+	4	9412	1719	572	62.998	8.0169
NtNPF5.7	Nitab4.5_0004154g0030	Nitab4.5_0004154:60684-64168	-	4	3485	1719	572	62.968	6.2968
NtNPF5.8	Nitab4.5_0009715g0040	Nitab4.5_0009715:37837-54043	-	8	16207	1923	640	70.9773	7.6395
NtNPF5.9	Nitab4.5_0002651g0050	Nt23:113475645-113477504	+	3	1860	1236	411	46.6686	4.3128
NtNPF5.10	Nitab4.5_0002650g0020	Nt07:32461497-32465699	+	4	4203	942	313	34.4475	8.5357
NtNPF5.11	Nitab4.5_0002650g0030	Nt07:32551003-32553586	+	3	2584	1536	512	57.4093	9.057
NtNPF5.12	Nitab4.5_0001264g0210	Nitab4.5_0001264:577400-586960	-	6	9561	3360	1120	125.79	9.3061
NtNPF5.13	Nitab4.5_0002650g0010	Nt07:32465741-32469994	+	4	4254	1941	647	74.1016	9.7103
NtNPF5.14	Nitab4.5_0000828g0010	Nt05:15932171-15935928	-	4	3758	1788	595	66.4677	9.004
NtNPF5.15	Nitab4.5_0002170g0010	Nt24:17450249-17453975	+	4	3727	1794	597	66.6729	8.5839
NtNPF5.16	Nitab4.5_0000652g0020	Nt24:17331203-17335541	+	3	4339	1422	473	53.0481	9.4628
NtNPF5.17	Nitab4.5_0000362g0150	Nt02:20534781-20539584	+	4	4804	1632	543	60.8484	9.0947
NtNPF5.18	Nitab4.5_0003084g0040	Nitab4.5_0003084:300155-306462	-	4	6308	1605	534	59.8263	9.0911
NtNPF5.19	Nitab4.5_0000652g0030	Nt24:17379934-17381515	+	3	1582	549	182	20.542	6.7761
NtNPF5.20	Nitab4.5_0000263g0160	Nt04:80605016-80608575	-	4	3560	1671	556	62.6706	8.6756
NtNPF5.21	Nitab4.5_0009443g0010	Nitab4.5_0009443:15064-19400	-	4	4337	1623	540	60.5503	8.9061
NtNPF5.22	Nitab4.5_0002389g0060	Nt22:96115863-96118270	-	3	2408	1497	499	55.6033	9.6174
NtNPF5.23	Nitab4.5_0003295g0180	Nt22:100511521-100515165	-	4	3645	1803	600	67.0638	9.578
NtNPF5.24	Nitab4.5_0002008g0070	Nitab4.5_0002008:413772-421841	+	4	8070	1632	543	60.7468	9.9237
NtNPF5.25	Nitab4.5_0005658g0020	Nt18:92410268-92417963	-	4	7696	1401	466	51.6271	9.1444
NtNPF6.1	Nitab4.5_0000622g0070	Nt21:67531612-67534535	-	5	2924	1776	591	64.9845	9.157
NtNPF6.2	Nitab4.5_0004644g0030	Nitab4.5_0004644:139703-142707	+	4	3005	1770	589	64.8472	9.0258
NtNPF6.3	Nitab4.5_0000482g0210	Nt02:100150528-100153290	-	5	2763	1773	590	65.2301	9.9125
NtNPF6.4	Nitab4.5_0003449g0030	Nt10:101198436-101201516	+	4	3081	1767	588	65.0968	9.7911
NtNPF6.5	Nitab4.5_0000763g0030	Nt15:85005174-85012389	-	5	7216	1737	578	63.6268	9.7463
NtNPF6.6	Nitab4.5_0002116g0050	Nt05:32840392-32849443	-	5	9052	1731	576	63.0902	9.5387
NtNPF6.7	Nitab4.5_0000163g0340	Nt08:95338478-95341295	+	5	2818	1233	410	44.5322	8.9156
NtNPF6.8	Nitab4.5_0001750g0050	Nitab4.5_0001750:423453-426246	+	6	2794	1656	551	60.7024	9.821
NtNPF6.9	Nitab4.5_0001292g0050	Nt08:19466259-19471181	+	5	4923	1779	592	65.5399	9.0697
NtNPF6.10	Nitab4.5_0003531g0060	Nitab4.5_0003531:166751-170135	-	5	3385	1779	592	65.5699	9.3827
NtNPF6.11	Nitab4.5_0000312g0370	Nt23:21520142-21524803	+	5	4662	1629	542	60.1072	8.7152
NtNPF6.12	Nitab4.5_0004430g0080	Nt01:10820589-10825161	-	5	4573	1650	549	60.9943	9.2131
NtNPF6.13	Nitab4.5_0006367g0020	Nitab4.5_0006367:122638-127555	+	4	4918	1722	573	63.4822	9.1664
NtNPF6.14	Nitab4.5_0000712g0280	Nt05:105881841-105882317	+	1	477	477	158	17.842	6.9413
NtNPF6.15	Nitab4.5_0008372g0010	Nitab4.5_0008372:72780-78215	+	4	5436	1722	573	63.4283	9.2847
NtNPF6.16	Nitab4.5_0012102g0010	Nitab4.5_0012102:36409-38946	+	3	2538	798	265	28.8114	9.3072
NtNPF6.17	Nitab4.5_0000712g0270	Nt05:105877730-105880242	+	3	2513	798	265	28.8004	9.3072
NtNPF6.18	Nitab4.5_0012102g0020	Nitab4.5_0012102:40944-41420	+	1	477	477	158	17.833	6.9406
NtNPF6.19	Nitab4.5_0004349g0010	Nitab4.5_0004349:2634-5601	-	4	2968	1806	601	66.257	9.2252
NtNPF6.20	Nitab4.5_0002569g0070	Nt12:121084005-121087359	-	4	3355	1911	636	70.3265	9.221
NtNPF7.1	Nitab4.5_0010616g0030	Nitab4.5_0010616:8066-10800	+	4	2735	1776	591	65.3543	7.9341
NtNPF7.2	Nitab4.5_0001146g0140	Nt09:100097076-100101148	+	5	4073	1620	540	59.6889	8.8127
NtNPF7.3	Nitab4.5_0007607g0020	Nt18:3768589-3772373	+	4	3785	1353	451	49.3467	9.6419
NtNPF7.4	Nitab4.5_0000166g0100	Nt23:78193844-78196230	+	5	2387	1761	586	64.798	8.4953
NtNPF7.5	Nitab4.5_0007712g0010	Nitab4.5_0007712:114724-118750	-	7	4027	1806	601	66.6862	8.2322
NtNPF7.6	Nitab4.5_0004264g0030	Nitab4.5_0004264:190167-192704	-	4	2538	1770	589	65.9144	8.2708
NtNPF7.7	Nitab4.5_0000018g0210	Nt23:85082450-85087936	+	5	5487	1767	588	65.2509	8.3769
NtNPF7.8	Nitab4.5_0000764g0060	Nt01:56065716-56074125	+	5	8410	1788	595	66.1068	8.2609
NtNPF7.9	Nitab4.5_0007026g0010	Nt15:104830882-104833020	-	3	2139	1608	535	59.6428	6.8195
NtNPF7.10	Nitab4.5_0006398g0030	Nitab4.5_0006398:79244-97405	-	8	18162	3477	1158	128.198	7.1354
NtNPF7.11	Nitab4.5_0007026g0020	Nt15:104843172-104847924	-	4	4753	1767	588	65.1542	6.7162
NtNPF8.1	Nitab4.5_0001881g0010	Nt20:22797926-22803362	-	5	5437	1716	571	63.6217	5.5433
NtNPF8.2	Nitab4.5_0000356g0080	Nt02:58878288-58889215	+	4	10928	1308	435	48.754	8.446
NtNPF8.3	Nitab4.5_0007317g0010	Nitab4.5_0007317:19728-20435	-	1	708	708	235	26.1367	7.1246
NtNPF8.4	Nitab4.5_0001837g0060	Nitab4.5_0001837:445068-447046	-	4	1979	1695	564	62.8767	7.2359
NtNPF8.5	Nitab4.5_0000008g0830	Nt02:16597204-16599262	+	4	2059	1740	579	64.9502	8.4305
NtNPF8.6	Nitab4.5_0007563g0010	Nitab4.5_0007563:109877-113058	+	4	3182	1638	545	60.9345	7.9038
NtNPF8.7	Nitab4.5_0000008g0840	Nt02:16582731-16585927	+	4	3197	1710	569	63.7357	8.2234
NtNPF8.8	Nitab4.5_0007908g0030	Nt10:21452676-21454593	+	4	1918	1461	486	54.6054	9.479
NtNPF8.9	Nitab4.5_0000261g0240	Nitab4.5_0000261:1043371-1044088	+	3	718	492	164	18.1257	8.3305
NtNPF8.10	Nitab4.5_0000490g0010	Nt02:31827791-31829772	+	5	1982	1185	394	44.1772	9.5022
NtNPF8.11	Nitab4.5_0004718g0020	Nitab4.5_0004718:92149-95393	+	4	3245	1707	568	63.4054	8.2986
NtNPF8.12	Nitab4.5_0000744g0200	Nitab4.5_0000744:637256-640769	-	4	3514	1707	568	63.4084	8.6359
NtNPF8.13	Nitab4.5_0001091g0020	Nitab4.5_0001091:24695-27882	-	5	3188	1854	617	69.1193	9.4805
NtNPF8.14	Nitab4.5_0000577g0010	Nt20:57764790-57770665	+	5	5876	1689	562	62.7637	7.4891
