# Supplementary material for: Genome-wide identification and characterization of NPF family reveals NtNPF6.13 involving in salt stress in Nicotiana tabacum
Source: Front Plant Sci. 2022 Oct 13;13:999403. doi: 10.3389/fpls.2022.999403 (PMC9608447; doi:10.3389/fpls.2022.999403)
Supplement: Supplementary Table 3 — Cis-acting elements of NtNPF genes. [file Table_3.xlsx]

## Sheet: Sheet1
group	function	element	NtNPF5.9	NtNPF5.10	NtNPF5.11	NtNPF5.12	NtNPF5.13	NtNPF5.14	NtNPF5.15	NtNPF5.16	NtNPF5.17	NtNPF5.18	NtNPF5.19	NtNPF5.1	NtNPF5.2	NtNPF5.3	NtNPF5.4	NtNPF5.5	NtNPF5.6	NtNPF5.7	NtNPF5.8	NtNPF5.20	NtNPF5.21	NtNPF5.22	NtNPF5.23	NtNPF5.24	NtNPF5.25	NtNPF7.1	NtNPF7.2	NtNPF7.3	NtNPF7.4	NtNPF7.5	NtNPF7.6	NtNPF7.7	NtNPF7.8	NtNPF7.9	NtNPF7.10	NtNPF7.11	NtNPF8.1	NtNPF8.2	NtNPF8.3	NtNPF8.4	NtNPF8.5	NtNPF8.6	NtNPF8.7	NtNPF8.8	NtNPF8.9	NtNPF8.10	NtNPF8.11
Stress_responsiveness	cis-acting regulatory element involved in light responsiveness	G-box	3	0	7	1	5	1	0	5	2	4	5	5	6	2	4	0	3	1	8	9	5	4	3	1	3	1	2	3	2	6	10	1	2	0	0	1	0	1	0	1	1	2	2	0	1	1	7
Stress_responsiveness	part of a conserved DNA module involved in light responsiveness	Box 4	1	4	1	1	0	2	2	1	2	1	3	3	3	2	3	2	4	4	3	5	5	2	3	2	3	5	2	1	6	11	4	0	1	5	4	4	2	1	0	0	4	2	5	2	4	4	1
Phytohormone_responsiveness	cis-acting element involved in the abscisic acid responsiveness	ABRE	3	0	7	2	6	1	0	1	1	4	5	3	4	2	3	0	1	0	7	7	3	6	2	1	3	1	2	3	2	5	9	0	2	0	0	1	0	0	0	1	0	1	1	1	1	2	3
Stress_responsiveness	cis-acting regulatory element essential for the anaerobic induction	ARE	0	0	2	2	4	0	5	2	1	0	3	3	2	1	1	1	0	0	3	1	1	1	4	1	2	0	1	1	3	2	5	1	0	1	0	1	2	0	0	0	2	6	2	1	1	1	5
Stress_responsiveness	light responsive element	GT1-motif	0	0	0	1	1	2	2	1	2	2	0	3	2	0	0	0	1	1	0	1	1	3	2	2	1	0	0	0	1	0	2	0	1	0	2	4	0	2	0	2	1	1	0	1	1	2	1
Phytohormone_responsiveness	cis-acting regulatory element involved in the MeJA-responsiveness	CGTCA-motif	0	1	4	3	2	1	1	0	1	4	1	2	2	1	3	0	1	2	0	0	2	0	1	1	1	0	2	0	3	0	3	1	1	0	0	0	0	0	0	0	0	1	0	0	1	1	4
Phytohormone_responsiveness	cis-acting regulatory element involved in the MeJA-responsiveness	TGACG-motif	0	1	4	3	2	1	1	0	1	4	1	2	2	1	3	0	1	2	0	0	2	0	1	1	1	0	2	0	3	0	3	1	1	0	0	0	0	0	0	0	0	1	0	0	1	1	4
Stress_responsiveness	part of a light responsive element	TCT-motif	1	0	2	3	2	1	0	0	1	1	0	4	2	0	0	2	1	0	2	1	2	2	3	0	0	0	1	1	3	2	2	2	2	2	1	1	1	0	0	0	1	1	2	2	2	3	0
Stress_responsiveness	MYB binding site involved in drought-inducibility	MBS	0	0	1	0	1	1	0	2	1	1	1	1	1	2	0	3	1	0	2	0	1	0	1	0	0	0	0	0	1	0	0	0	0	0	1	0	0	3	0	2	1	0	0	3	0	0	1
Stress_responsiveness	part of a light responsive element	GATA-motif	1	0	0	1	1	2	1	2	0	0	1	1	0	1	1	0	2	3	1	0	1	0	0	1	1	1	2	3	0	0	0	1	0	1	2	0	1	0	0	2	0	0	1	0	0	0	0
Stress_responsiveness	cis-acting element involved in low-temperature responsiveness	LTR	2	0	0	0	0	1	0	1	0	0	0	0	0	0	2	0	0	0	0	0	0	0	1	2	0	3	0	0	1	1	4	0	0	0	0	1	1	0	0	0	0	0	2	1	2	1	1
Stress_responsiveness	cis-acting element involved in defense and stress responsiveness	TC-rich repeats	0	1	1	0	0	0	0	0	0	1	0	0	0	0	0	1	1	1	1	0	0	0	2	0	0	0	0	0	1	1	1	1	0	0	1	0	1	1	0	3	3	0	2	2	3	1	0
Phytohormone_responsiveness	cis-acting element involved in salicylic acid responsiveness	TCA-element	1	1	0	0	0	0	0	0	0	0	0	1	1	0	0	0	1	1	0	3	1	1	0	1	0	0	0	2	0	2	0	0	0	1	2	1	0	0	0	0	0	0	2	1	0	0	0
Phytohormone_responsiveness	auxin-responsive element	TGA-element	0	0	0	0	0	1	0	3	2	0	0	0	0	1	1	0	0	0	0	0	0	0	1	1	0	0	1	1	0	1	0	0	0	0	1	1	0	0	0	1	1	0	0	1	2	2	1
Stress_responsiveness	part of a module for light response	AE-box	1	0	0	0	1	1	0	2	1	0	0	0	1	1	0	0	0	2	0	1	1	1	1	1	1	1	2	1	0	0	0	0	0	0	0	0	0	1	0	2	0	0	1	0	0	0	0
Plant_growth_and_development	cis-acting regulatory element related to meristem expression	CAT-box	0	2	0	0	1	1	1	0	0	0	0	0	0	3	3	0	0	0	0	0	1	0	0	0	0	0	0	0	0	1	0	0	0	0	2	0	0	0	0	0	0	0	0	0	0	0	0
Stress_responsiveness	MYB binding site involved in light responsiveness	MRE	0	0	1	3	0	0	0	2	1	1	1	1	1	0	0	1	0	0	1	0	2	0	0	0	0	0	1	1	0	0	0	3	1	1	0	0	0	0	0	1	1	1	1	0	0	0	0
Plant_growth_and_development	cis-acting regulatory element involved in zein metabolism regulation	O2-site	1	0	1	1	1	0	0	0	0	2	1	0	0	0	0	1	0	0	0	0	0	0	0	0	0	0	0	0	0	0	2	0	2	0	0	0	0	0	0	0	0	0	0	0	0	0	1
Phytohormone_responsiveness	cis-acting element involved in gibberellin-responsiveness	TATC-box	0	0	1	1	0	0	0	1	0	0	0	0	0	0	0	1	1	0	0	0	0	0	0	0	0	0	1	1	0	0	0	1	1	0	0	0	0	0	0	1	0	1	0	0	0	0	0
Stress_responsiveness	part of a light responsive element	I-box	1	0	0	1	0	0	0	3	0	0	0	0	0	0	0	0	0	0	0	0	0	0	0	0	0	1	0	0	1	0	0	1	0	0	0	0	0	0	0	0	0	0	0	0	0	0	0
Phytohormone_responsiveness	gibberellin-responsive element	P-box	0	0	0	0	0	0	0	0	0	0	0	1	0	1	0	0	1	0	0	0	0	1	1	0	0	0	1	0	1	0	0	0	0	0	1	0	1	1	0	1	0	1	1	0	0	0	0
Plant_growth_and_development	cis-regulatory element involved in endosperm expression	GCN4_motif	0	0	0	0	0	0	0	0	0	0	0	0	0	1	0	0	0	0	0	1	0	0	0	0	0	1	0	0	0	0	1	0	1	0	0	0	0	0	0	0	0	1	0	1	0	0	0
Phytohormone_responsiveness	cis-acting regulatory element involved in auxin responsiveness	AuxRR-core	0	0	0	0	0	0	1	0	0	0	0	0	0	0	0	0	0	0	0	1	1	0	0	0	0	2	0	0	0	0	0	0	0	0	1	2	1	1	0	0	0	0	0	0	1	0	1
Phytohormone_responsiveness	gibberellin-responsive element	GARE-motif	0	0	1	0	2	0	1	0	1	0	0	0	0	0	0	0	0	0	0	1	0	0	1	0	0	0	0	0	0	0	0	0	0	0	1	1	0	0	0	0	0	0	0	0	0	0	0
Stress_responsiveness	part of a conserved DNA module involved in light responsiveness	ATCT-motif	0	0	0	0	0	0	0	1	0	0	0	0	0	0	0	0	0	0	0	0	1	0	0	0	0	0	0	0	0	0	0	0	0	0	1	0	0	0	0	0	2	1	1	0	0	0	1
Stress_responsiveness	part of a light responsive element	GA-motif	0	0	0	0	0	0	0	1	0	0	0	0	0	0	0	0	0	0	1	1	0	1	0	0	0	0	0	0	0	0	0	0	0	0	0	0	1	1	0	0	0	0	0	0	0	0	1
Stress_responsiveness	light responsive element	Sp1	2	0	0	0	0	0	0	0	0	0	0	0	0	0	1	0	0	0	0	0	1	0	0	1	0	0	0	0	0	0	0	0	0	0	0	0	0	1	0	0	0	0	0	0	0	0	0
Stress_responsiveness	part of a light responsive element	chs-CMA1a	0	1	1	0	0	1	1	1	1	1	0	0	0	0	1	1	0	0	0	0	0	0	2	1	0	0	0	1	0	1	1	0	0	2	0	0	0	0	0	0	0	1	1	0	0	0	0
Stress_responsiveness	part of a light responsive element	TCCC-motif	1	1	0	1	0	0	0	0	0	0	0	1	1	0	0	0	0	0	0	0	0	2	0	0	0	0	0	0	0	0	0	0	0	0	0	1	1	1	0	0	0	0	0	0	0	0	0
Plant_growth_and_development	cis-acting regulatory element involved in circadian control	circadian	0	0	1	0	0	0	1	0	0	0	0	0	0	0	0	1	0	0	0	0	0	0	0	0	0	1	1	1	0	0	0	0	0	0	0	0	0	0	0	0	0	0	0	0	1	0	0
Stress_responsiveness	part of a light responsive element	chs-CMA2a	0	0	0	0	0	0	0	0	0	0	0	0	0	0	0	0	0	0	0	1	0	0	0	0	3	1	1	0	0	0	0	1	0	1	1	0	0	0	0	0	0	0	0	0	0	0	0
Stress_responsiveness	cis-acting element involved in light responsiveness	ACE	0	0	1	0	0	0	0	0	0	0	1	0	0	0	0	0	0	0	0	0	0	0	0	0	0	0	0	0	0	0	0	0	0	0	0	0	0	0	0	0	0	0	0	0	0	0	0
Stress_responsiveness	part of a light responsive element	LAMP-element	0	0	0	0	0	0	0	0	0	0	0	0	0	0	0	0	0	0	2	0	0	0	0	0	1	0	0	0	0	1	0	0	0	0	0	0	0	0	0	0	0	0	0	0	0	0	0
Plant_growth_and_development	element involved in differentiation of the palisade mesophyll cells	HD-Zip 1	0	0	0	0	0	1	1	1	1	1	0	0	1	0	0	0	0	1	0	0	0	0	1	1	1	0	0	0	0	0	0	0	0	0	0	0	0	0	0	0	0	0	0	0	0	0	0
Plant_growth_and_development	element for maximal elicitor-mediated activation (2copies)	AT-rich sequence	0	0	1	0	0	1	0	0	0	0	0	0	0	2	1	0	0	0	0	1	0	1	0	0	0	0	0	0	0	0	0	0	0	0	0	0	0	0	0	0	1	0	0	0	0	0	0
Stress_responsiveness	part of a light responsive element	Gap-box	0	0	0	0	0	0	0	0	0	0	0	0	0	1	0	0	0	0	0	0	0	0	0	0	0	1	0	0	0	0	0	0	0	0	0	0	0	0	0	0	0	0	0	0	0	0	0
Stress_responsiveness	enhancer-like element involved in anoxic specific inducibility	GC-motif	0	0	0	0	0	0	0	0	0	1	0	0	0	0	1	0	0	0	0	0	0	0	0	0	0	0	0	0	0	0	0	0	0	0	0	0	0	1	0	0	0	0	0	0	0	0	0
Stress_responsiveness	part of a light responsive module	AT1-motif	0	0	0	0	0	0	0	0	0	0	0	0	0	0	0	0	0	0	0	0	0	0	0	0	0	0	0	0	0	0	0	0	0	1	0	0	0	0	0	0	0	0	0	0	0	0	0
Stress_responsiveness	part of a conserved DNA module involved in light responsiveness	ATC-motif	1	0	0	0	0	1	1	0	0	0	0	0	0	0	0	0	0	0	0	0	0	0	0	0	0	0	0	0	0	0	0	0	0	0	0	0	1	0	0	0	0	0	0	0	0	0	0
Plant_growth_and_development	MYB binding site involved in flavonoid biosynthetic genes regulation	MBSI	0	0	0	0	0	0	1	0	1	0	0	0	0	0	0	0	1	1	0	0	0	0	0	0	0	0	0	0	0	0	0	0	0	1	0	0	0	0	0	0	0	0	0	0	0	0	0
Phytohormone_responsiveness	part of an auxin-responsive element	TGA-box	0	0	0	1	0	0	0	0	0	0	0	0	0	0	0	0	1	0	0	0	0	0	0	0	0	0	0	0	0	0	0	0	0	0	0	0	0	0	0	0	0	0	0	0	0	0	0
Stress_responsiveness	light responsive element	3-AF1 binding site	0	0	0	0	0	1	0	0	0	0	0	0	0	0	0	0	0	0	0	0	0	0	0	0	0	0	1	0	0	0	0	0	0	1	0	0	0	0	0	0	0	0	0	0	0	0	0
Plant_growth_and_development	cis-acting element involved in cell cycle regulation	MSA-like	0	0	1	0	0	0	0	0	0	0	0	0	0	0	0	0	0	0	0	0	0	0	0	0	0	0	0	0	0	0	0	0	0	0	0	0	0	0	0	0	0	0	0	0	0	0	0
Stress_responsiveness	part of a light responsive element	Box II	0	0	0	0	0	0	0	0	0	0	0	0	0	0	0	0	0	0	0	0	0	0	0	0	0	0	0	0	1	0	0	0	0	0	0	0	0	0	0	0	0	0	0	0	0	0	0
Plant_growth_and_development	cis-acting regulatory element involved in seed-specific regulation	RY-element	0	0	0	0	0	0	0	0	0	0	0	0	0	0	0	0	0	0	0	0	0	0	0	0	0	0	0	0	0	0	0	0	0	0	0	0	0	0	0	0	1	0	0	0	0	0	0
Stress_responsiveness	light responsive element	AAAC-motif	0	0	0	0	0	0	0	0	0	0	0	0	0	0	0	0	0	0	0	0	0	0	0	0	0	0	0	0	0	0	0	0	1	0	0	0	0	0	0	0	0	0	0	0	0	0	0
Stress_responsiveness	part of a light responsive element	L-box	0	0	0	0	0	0	0	0	0	0	0	0	0	0	0	0	0	0	0	1	0	0	0	0	0	1	0	0	0	0	0	0	0	0	0	0	0	0	0	0	0	0	0	0	0	0	0
Stress_responsiveness	part of a light responsive element	GTGGC-motif	0	0	0	0	0	0	0	0	0	0	0	0	0	0	0	0	0	0	0	0	0	0	0	0	0	0	0	0	0	0	0	0	0	0	0	0	0	0	0	0	0	0	0	0	0	0	0
Stress_responsiveness	part of a light responsive element	LS7	0	0	0	0	0	0	0	0	0	0	0	0	0	0	0	0	0	0	0	0	0	0	0	0	0	0	0	0	0	0	0	0	0	0	0	0	0	0	0	0	0	0	0	0	0	0	0
Plant_growth_and_development	cis-acting regulatory element root specific	motif I	0	0	0	0	0	0	0	0	0	0	0	0	0	0	0	0	0	0	0	0	0	0	0	0	0	0	0	0	0	0	1	0	0	0	0	0	0	0	0	0	0	0	0	0	0	0	0
Phytohormone_responsiveness	part of an auxin-responsive element	AuxRE	0	0	0	0	0	0	0	0	0	0	0	0	0	0	0	0	0	0	0	0	0	0	0	1	0	0	0	0	0	0	0	0	0	0	0	0	0	0	0	0	0	0	0	0	0	0	0
Stress_responsiveness	light responsive element	4cl-CMA1b	0	0	0	0	0	0	0	0	0	0	0	1	1	0	0	0	0	0	0	0	0	0	0	0	0	0	0	0	0	0	0	0	0	0	0	0	0	0	0	0	0	0	0	0	0	0	0
Stress_responsiveness	part of gapA in (gapA-CMA1) involved with light responsiveness	ACA-motif	0	0	0	0	0	0	0	0	0	0	0	0	0	0	1	0	0	0	0	0	0	0	0	0	0	0	0	0	0	0	0	0	0	0	0	0	0	0	0	0	0	0	0	0	0	0	0
Stress_responsiveness	part of a light responsive element	chs-Unit 1 m1	0	0	0	0	0	0	0	0	0	0	0	0	0	0	0	0	0	0	0	0	0	0	0	0	0	0	0	0	0	0	0	0	0	0	0	0	0	0	0	0	0	0	0	0	0	0	0
Plant_growth_and_development	involved in endosperm-specific negative expression	AACA_motif	0	0	0	0	0	0	0	0	0	0	0	0	0	0	0	0	0	0	0	0	0	0	0	0	0	0	0	0	0	0	0	0	0	0	0	0	0	0	0	0	0	0	0	0	0	0	0
Plant_growth_and_development	cis-acting regulatory element related to meristem specific activation	NON-box	0	0	0	0	0	0	0	0	0	1	0	0	0	0	0	0	0	0	0	0	0	0	0	0	0	0	0	0	0	0	0	0	0	0	0	0	0	0	0	0	0	0	0	0	0	0	0
Stress_responsiveness	part of a light responsive element	chs-CMA2c	0	0	0	0	0	0	0	0	0	0	0	0	0	0	0	0	0	0	0	0	0	0	0	0	0	0	0	0	0	0	0	0	0	0	0	0	0	0	0	0	0	0	0	0	0	0	0
Stress_responsiveness	cis-acting element involved in dehydration, low-temp, salt stresses	DRE	0	0	0	0	0	0	0	0	0	0	0	0	0	0	0	0	0	0	0	0	0	0	0	0	0	0	0	0	0	0	0	0	1	0	0	0	0	0	0	0	0	0	0	0	0	0	0
Stress_responsiveness	part of a light responsive element	GATT-motif	0	0	0	0	0	0	0	0	0	0	0	0	0	0	0	0	0	0	0	0	0	0	0	0	0	0	0	0	0	0	0	0	0	0	0	0	0	0	0	0	0	0	0	0	0	0	0
Stress_responsiveness	cis-acting element involved in phytochrome down-regulation expression	Unnamed_1	0	0	0	0	0	0	0	0	0	0	0	0	0	0	0	0	0	0	0	0	0	0	0	0	0	0	0	0	0	0	0	0	0	0	0	0	0	0	0	0	0	0	0	0	0	0	0
[truncated: 97 more columns]
