# Supplementary material for: Genome-wide identification and characterization of NPF family reveals NtNPF6.13 involving in salt stress in Nicotiana tabacum
Source: Front Plant Sci. 2022 Oct 13;13:999403. doi: 10.3389/fpls.2022.999403 (PMC9608447; doi:10.3389/fpls.2022.999403)
Supplement: Supplementary Table 4 — Expression analysis of NtNPF genes responsive to salt stress according to RNA-seq data. [file Table_4.xls]

## Sheet: Table S3
ID	R-CK-1	R-CK-2	R-CK-3	R-12h-1	R-12h-2	R-12h-3	R-3d-1	R-3d-2	R-3d-3	R-7d-1	R-7d-2	R-7d-3	L-CK-1	L-CK-2	L-CK-3	L-12h-1	L-12h-2	L-12h-3	L-3d-1	L-3d-2	L-3d-3	L-7d-1	L-7d-2	L-7d-3
NtNPF4.21	0.740991	0.278092	0.404342	0.099757	0.097519	0.08478	0.168047	0.615479	0.225719	0.952127	1.58373	0.839696	11.6938	11.4323	13.0112	20.6615	21.0353	20.0037	9.3051	8.92343	10.7905	7.18525	8.18758	11.7922
NtNPF6.7	0.952071	0.602406	0.739037	2.35574	2.28244	2.76013	1.33328	1.27672	2.89326	6.95975	8.29374	10.3793	41.8347	48.3562	43.2372	5.55447	5.38924	5.73255	20.4695	39.2936	36.4256	29.1043	36.7754	32.9541
NtNPF7.4	35.2852	46.1254	52.5314	9.70453	7.4192	1.58166	19.3307	12.3971	31.4776	6.55809	13.2452	2.57163	1.21558	0.544977	0.128864	0.10546	0.21235	0.283468	2.75023	0.558881	0.770748	5.14454	2.24819	1.15257
NtNPF6.11	640.41	521.444	553.2	28.8423	92.2323	74.6367	213.065	476.615	72.7685	104.601	194.759	48.6848	7.47906	6.89733	4.56115	1.04946	1.0571	0.586173	6.77856	7.74545	4.83555	5.46189	7.15479	6.07038
NtNPF8.2	7.09672	5.41768	6.7626	11.8615	15.3363	15.1212	9.72528	5.65584	13.7347	8.74982	8.1619	7.67722	1.41898	2.30597	1.37453	2.11243	2.11093	2.15704	1.63391	1.68391	1.49508	1.83587	2.84794	2.2742
NtNPF4.3	33.863	37.029	35.2176	36.2576	24.1542	26.4837	29.4747	33.0692	32.2388	21.1355	37.154	31.4491	2.80973	2.34266	2.81303	1.68084	2.67285	1.16337	1.23806	2.72052	7.03316	3.39594	2.96743	1.97609
NtNPF6.3	0.923918	0.226902	0.552611	1.48499	1.14368	1.54032	0.856723	0.564965	0.319824	0.791631	0.872545	0.905855	46.6472	43.6403	35.1507	4.24769	4.29992	4.79401	39.2958	39.9289	32.8557	22.1552	23.3511	22.2749
NtNPF6.17	149.829	68.1611	119.005	0.701628	4.35558	3.60685	20.7276	182.902	2.66605	62.6399	72.6263	37.9954	2.04274	1.58258	1.34742	0.861835	1.50181	1.27971	0.517631	0.934395	1.24868	0.836091	0.49778	0.301898
NtNPF6.14	203.493	83.3922	148.698	0.79084	5.56308	5.84915	25.3607	235.577	3.56334	56.09	84.9036	48.82	1.37874	1.41227	2.0006	1.83871	2.1861	1.17317	0.553881	0.769853	1.92538	1.36881	0.829051	0.834301
NtNPF8.12	10.2745	6.77358	8.89341	3.42208	2.34225	1.97876	7.61102	8.49077	3.91656	12.6388	10.51	12.6572	4.80972	4.18322	3.36075	6.99067	8.34692	5.78407	3.73346	4.09502	3.93418	4.53439	5.07282	4.33631
NtNPF6.5	0.370828	0.163884	0.103915	0.447841	0.974405	1.06162	0.33087	0.61334	0.280311	1.13754	2.33405	0.729409	29.2411	20.8025	22.7056	3.12462	3.12189	3.12888	17.8313	23.246	13.1433	14.9411	13.3209	14.5534
NtNPF5.12	27.8347	28.1655	29.2921	15.7871	13.0446	15.723	9.62394	15.7611	6.0066	5.71153	6.65249	6.56562	0	0.143774	0.042121	0.037986	0	0	0.011782	0	0.021124	0.012253	0	0.013355
NtNPF6.9	124.044	101.924	91.3506	3.39384	3.85429	5.99042	20.155	77.6676	4.49491	29.992	58.1324	44.0136	3.20879	2.27272	2.96177	2.62294	1.44574	1.44458	2.26855	1.48492	3.54353	2.97549	2.27625	3.59309
NtNPF1.11	1.15899	1.15011	1.50721	3.655	0.944599	0.316109	7.0968	6.1341	2.45329	4.85776	6.41042	5.11878	2.41443	1.90912	1.29671	1.78097	1.35881	9.47784	7.06953	7.02229	6.12665	16.4779	14.7396	11.1024
NtNPF1.12	1.19209	0.790708	1.11837	1.56346	0.789168	0.576977	2.68785	1.43652	1.28787	4.55562	4.4879	3.55368	1.93901	1.35613	1.07805	2.1442	2.51278	6.75104	9.59058	11.1662	6.5557	14.2063	12.4792	12.4589
NtNPF6.8	0.255208	0.240605	0.379947	1.0021	0.580202	0.419784	0.715227	1.04492	0.730542	4.54383	4.64591	4.7506	50.1431	53.243	58.5476	6.49626	8.66395	7.7154	32.8222	49.8522	32.2923	23.1415	26.1754	26.3197
NtNPF8.1	29.9898	29.5877	30.4812	45.8971	41.7101	40.8955	39.3817	29.3034	46.4089	35.1353	32.6595	33.6819	7.4421	8.66579	4.21455	11.0137	11.8781	8.92385	7.88106	7.75499	5.50262	10.0486	11.0344	7.88541
NtNPF6.6	0.120597	0.207987	0.184225	0.321085	0.357102	0.050173	0.73045	1.43247	0.428623	7.11402	13.6556	4.7811	52.5962	43.118	41.8652	7.67474	9.43648	7.37239	38.0972	41.9241	28.0441	36.7983	35.6407	34.4726
NtNPF4.4	20.4712	20.1684	17.0405	12.7881	8.13581	12.7036	10.9578	17.5487	11.5598	10.9261	15.6166	20.3392	7.37365	5.00896	4.44144	4.93484	6.71884	3.08843	3.65498	8.40832	7.43501	5.11291	3.69317	4.11299
NtNPF4.22	2.29776	2.48823	2.18163	0.738299	1.1117	3.33356	1.71535	1.32865	0.663554	2.2283	1.51215	1.92088	17.4223	19.5551	20.9128	23.2864	25.3427	21.2194	14.1145	15.298	13.7728	11.416	17.259	17.9651
NtNPF5.11	28.7341	31.3054	35.6981	9.71382	13.035	13.0773	4.6705	14.2637	1.11014	0.3197	1.7563	1.04206	0	0	0	0	0.024904	0	0	0	0	0	0	0
NtNPF6.4	0.178058	0.120086	0.312885	1.22695	1.13923	0.736702	0.271424	0.290233	0.310115	0.098636	0.246754	0.324544	50.5591	40.0605	28.4835	7.96692	10.3258	6.06279	37.1067	44.9018	25.1542	25.8674	31.7803	29.1577
NtNPF6.10	27.4287	10.2711	9.70318	8.99166	7.19259	8.77808	32.1382	22.3107	6.28092	26.883	27.4877	40.7511	0.199826	0.236619	0.347831	0.937658	0.391015	0.835794	0.281635	0.214527	0.264102	0.202813	0.637217	0.573689
NtNPF5.7	46.581	48.6039	44.1421	66.2566	59.6439	61.8681	57.8239	46.5923	49.8599	43.8272	53.6329	57.4922	30.6774	24.4221	19.07	12.0482	12.9696	12.1974	26.5997	25.168	20.199	29.8864	28.5777	26.848
NtNPF6.12	344.635	318.373	381.128	29.3132	52.5404	43.0192	165.594	258.116	55.1572	39.9482	77.5981	23.0406	17.5461	14.4285	13.737	3.66209	5.7857	3.21428	14.0741	17.6525	14.1986	15.5299	12.4874	13.5043
NtNPF8.11	4.94444	3.50298	3.00335	11.4456	5.61297	5.58909	8.07364	5.08367	6.70295	7.32815	7.37687	7.05799	4.09858	3.20044	2.55895	3.12598	4.23288	1.85501	1.97513	2.39492	2.089	3.29426	3.31664	2.21369
NtNPF5.2	13.4522	10.6564	8.22039	7.54047	8.88538	7.35063	15.1805	14.1099	9.6639	16.4048	18.8004	21.6408	7.34039	4.397	3.32789	3.30158	5.97439	2.0915	4.56952	6.98086	3.15017	5.5167	5.21743	5.49044
NtNPF5.25	2.27566	1.554	1.21752	18.5979	17.9094	15.5067	13.6466	2.47977	12.9991	7.43086	3.656	15.5917	1.14169	1.29461	0.977241	1.74998	2.46349	1.36839	1.38299	0.916344	0.727467	0.481622	0.257835	0.300481
NtNPF6.13	352.968	205.065	315.201	0.464722	5.11464	8.77009	35.2464	408.15	2.54827	105.146	151.683	85.9484	1.40994	1.46336	1.45423	3.55147	2.8238	3.65696	1.33503	1.36308	3.72666	2.62165	3.67192	2.98197
NtNPF7.10	70.6692	67.9291	66.5438	14.4292	22.6801	19.2417	22.9094	63.9345	10.0602	66.2309	57.0449	74.8172	5.73795	4.82263	3.15051	1.29701	2.61028	3.17827	7.72518	5.45479	3.20666	6.30608	6.03174	4.82907
NtNPF7.11	175.768	159.442	156.074	34.695	57.615	40.4208	98.6796	181.172	56.455	153.847	156.422	215.11	4.56053	1.76406	0.934744	0.304581	0.615943	0.536108	5.867	5.00136	0.84132	4.81321	2.71378	2.05629
NtNPF7.9	38.4785	39.1093	31.9924	3.47121	4.26863	3.19417	9.35738	43.3535	2.57238	31.1007	30.761	39.5127	10.0648	8.32948	7.22645	3.25065	5.76536	6.0428	6.79308	8.21894	5.17438	5.70519	5.6649	5.53786
NtNPF5.1	19.8207	17.2831	13.3873	7.51168	10.1831	9.92064	16.0232	21.4262	11.1907	24.7212	23.9945	36.8891	8.84289	7.35582	4.96544	3.69491	6.16897	3.14352	6.16161	10.13	3.83157	7.53549	7.36628	8.66728
NtNPF8.3	28.645	25.67	24.1978	46.8565	44.4644	41.2932	39.3132	29.0323	49.4175	26.1891	34.6837	33.1625	7.52554	5.59502	6.08187	9.54025	9.49399	9.20028	6.85238	5.03544	4.96055	8.17694	5.98712	7.14599
NtNPF2.22	6.50579	4.93126	5.45748	0.892082	0.635873	0.633233	2.45697	4.25474	0.868817	3.04053	6.5646	2.14899	1.03843	0.534914	0.659086	2.10914	3.12609	2.47118	1.27193	0.67932	3.00748	11.4392	4.97102	1.62701
NtNPF6.15	151.225	114.036	149.544	1.07814	4.74947	5.38201	25.9599	178.018	3.36015	41.771	85.5035	48.9875	0.148646	0.082931	0.216264	0.361703	0.389595	0.129078	0.146335	0.096584	0.399929	0.222746	0	0.089729
NtNPF5.8	7.07494	5.9889	7.22794	37.4075	28.4099	33.8808	18.8799	6.6539	30.7624	10.3641	7.86166	15.6231	1.64954	1.6611	1.05504	1.38989	1.83715	0.816714	1.53577	1.8773	1.76911	2.2716	1.99284	2.2458
NtNPF2.23	5.40252	5.99709	5.27722	2.62995	2.96194	2.93687	5.52929	6.81845	4.50467	4.40952	8.13588	5.75027	5.09259	3.53219	4.10812	1.40092	1.95681	3.07344	6.34265	2.34247	3.61773	7.13316	3.98701	2.83826
NtNPF6.16	308.861	251.492	324.145	2.56074	13.2723	14.3078	58.0245	322.026	10.6024	158.556	181.606	96.5214	0	0	0	0	0	0	0	0	0	0	0	0
NtNPF6.18	394.855	307.01	370.469	1.6816	16.1988	12.3221	60.3064	393.879	10.3418	81.7775	188.523	85.1003	0	0	0	0	0	0	0	0	0	0	0	0
NtNPF3.3	0	0.031801	0	0.130284	0	0.024377	0	0	0	0	0.02747	0	18.7976	5.24101	9.25243	11.4734	10.7983	17.2305	24.2343	26.316	17.2442	34.6332	17.826	36.9117
NtNPF5.14	0	0	0	0	0	0	0	0.046936	0	0	0.028657	0	15.4692	18.3581	13.5166	6.53075	8.42944	8.23942	15.8845	26.1505	18.8089	23.487	28.0467	19.1096
NtNPF3.4	0	0	0	0	0	0.064466	0	0	0	0	0	0.0336	40.2996	16.4208	27.6388	10.8268	11.0802	10.2026	50.6674	47.1159	26.325	41.1154	25.8991	53.0108
