# Supplementary material for: Genome-wide identification and characterization of NPF family reveals NtNPF6.13 involving in salt stress in Nicotiana tabacum
Source: Front Plant Sci. 2022 Oct 13;13:999403. doi: 10.3389/fpls.2022.999403 (PMC9608447; doi:10.3389/fpls.2022.999403)
Supplement: Supplementary Table 5 — Haplotype of AtNPF6.3 subclade. [file Table_5.xlsx]

## Sheet: Sheet1
ID	haplotype	Type
AtNPF6.3	THTF	B-type
MtNPF6.5	TYTF	A-type
MtNPF6.6	NQMF	C-type
MtNPF6.7	THTF	B-type
NtNPF6.10	TYTF	A-type
NtNPF6.11	TYTF	A-type
NtNPF6.12	TYTF	A-type
NtNPF6.13	-YTF	u
NtNPF6.14	---F	u
NtNPF6.15	-YTF	u
NtNPF6.16	----	u
NtNPF6.17	----	u
NtNPF6.18	---F	u
NtNPF6.9	TYTF	A-type
OsNRT1.1A	TYTF	A-type
OsNRT1.1B	THTF	B-type
OsNRT1.1C	TYTF	A-type
SlNPF6.10	TYTF	A-type
SlNPF6.8	TYTF	A-type
SlNPF6.9	TYTF	A-type
StNPF6.10	TYTF	A-type
StNPF6.6	TYTF	A-type
StNPF6.7	TYTF	A-type
ZmNPF6.4	TYTF	A-type
ZmNPF6.6	THTF	B-type
